# Supplementary material for: An injectable self-healing CS/PDA–AgNPs hybrid hydrogel for mild and highly-efficient photothermal sterilization
Source: Royal Society of Chemistry journal article supplement (doi:10.1039/d2nj00878e), 2022-01-01
Supplement: d2nj00878e2.pdf [file d2nj00878e2.pdf]

## Supplementary Information

### **An injectable self-healing CS/PDA-AgNPs hybrid hydrogel for mild and highly-efficient photothermal sterilization**

Ying Gan, Chen Lin, Hao Zhu, Xuedan Cheng, Chaoqun Liu\* and Jiahua Shi\*

Key Laboratory of Natural Medicine and Immune-Engineering of Henan Province, Henan University, Kaifeng, 475004, PR China.

E-mail: [cqliu@henu.edu.cn](mailto:cqliu@henu.edu.cn), [sjiahua@henu.edu.cn](mailto:sjiahua@henu.edu.cn)

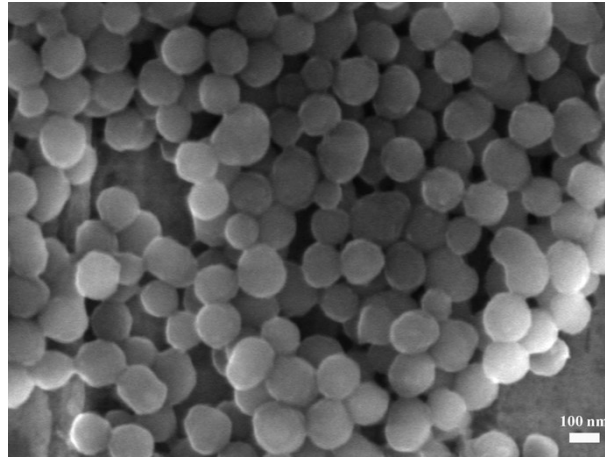

Fig. S1 The SEM image of PDANPs.

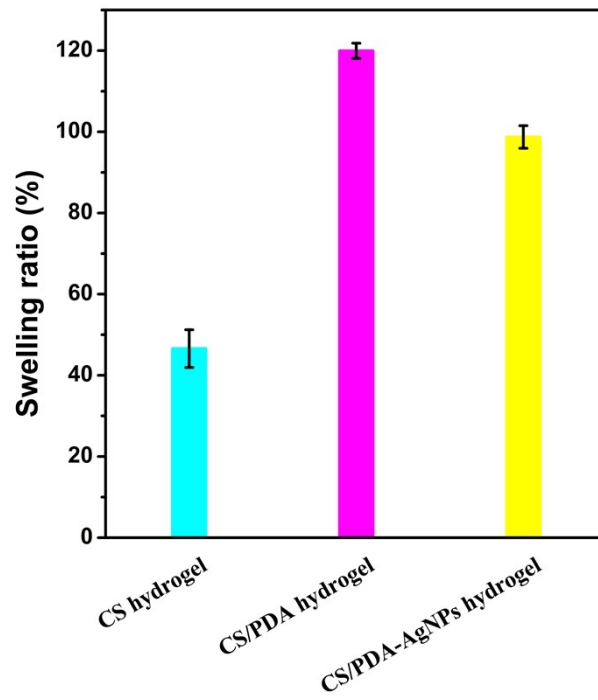

Fig. S2 Swelling ratio of various hydrogels after 24 h in PBS, pH 7.4 at 37 °C.

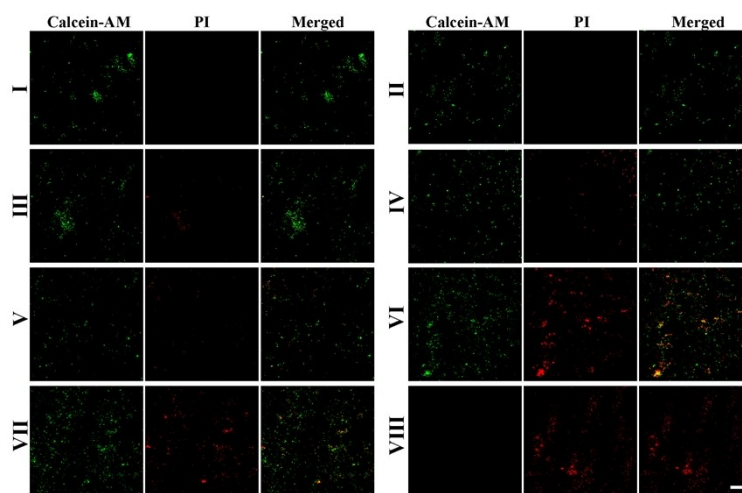

Fig. S3 The fluorescence images of *E. coli* with various treatments. Green (Calcein-AM) represents viable bacteria and red (PI) indicates dead bacteria. Scale bar are 50  $\mu\text{m}$ . (I: PBS, II: PBS+NIR, III: CS hydrogel, IV: CS hydrogel + NIR, V: CS/PDA hydrogel, VI: CS/PDA hydrogel + NIR, VII: CS/PDA-AgNPs hydrogel, VIII: CS/PDA-AgNPs hydrogel + NIR.)
