# Supplementary figures and images for: An injectable self-healing CS/PDA–AgNPs hybrid hydrogel for mild and highly-efficient photothermal sterilization
Source: Royal Society of Chemistry journal article supplement (doi:10.1039/d2nj00878e), 2022-01-01

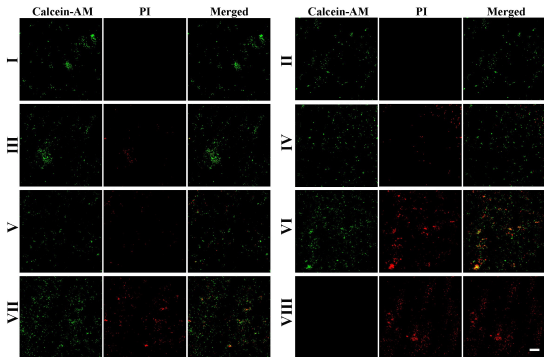

Supplement: d2nj00878e1.pdf [file d2nj00878e1.pdf]

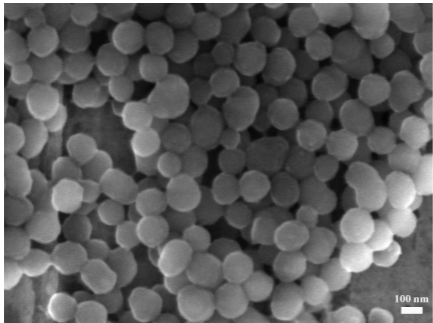

Supplement: d2nj00878e3.pdf [file d2nj00878e3.pdf]

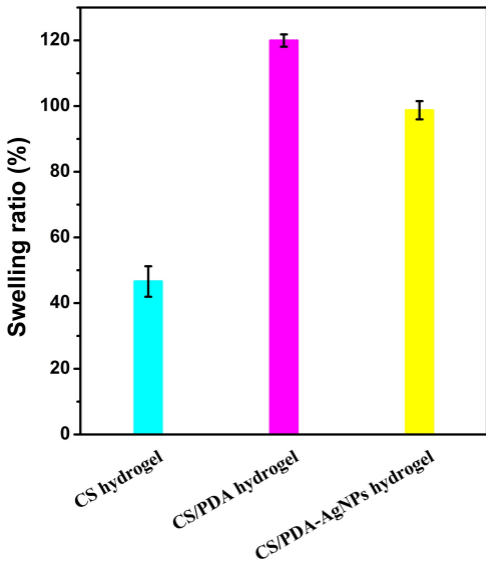

Supplement: d2nj00878e4.pdf [file d2nj00878e4.pdf]
